# Supplementary material for: Enhancing sound insulation of glass interlayer films by introducing piezoelectric fibers
Source: Royal Society of Chemistry journal article supplement (doi:10.1039/d3ma00150d), 2023-01-01
Supplement: d3ma00150d1.pdf [file d3ma00150d1.pdf]

## Support Information

### **Enhancing sound insulation of glass interlayer film by introducing piezoelectric fibers**

*Donghe Chen, Shuo Zheng, Mingyu Jing, Zaiqian Yu, Jiawei Zhang, Longjiao Yu, Shulin  
Sun and Shiwei Wang\**

School of Chemical Engineering, Advanced Institute of Materials Science, Changchun  
University of Technology, Changchun 130012, P. R. China.

E-mail: [wswjldx2004@163.com](mailto:wswjldx2004@163.com)

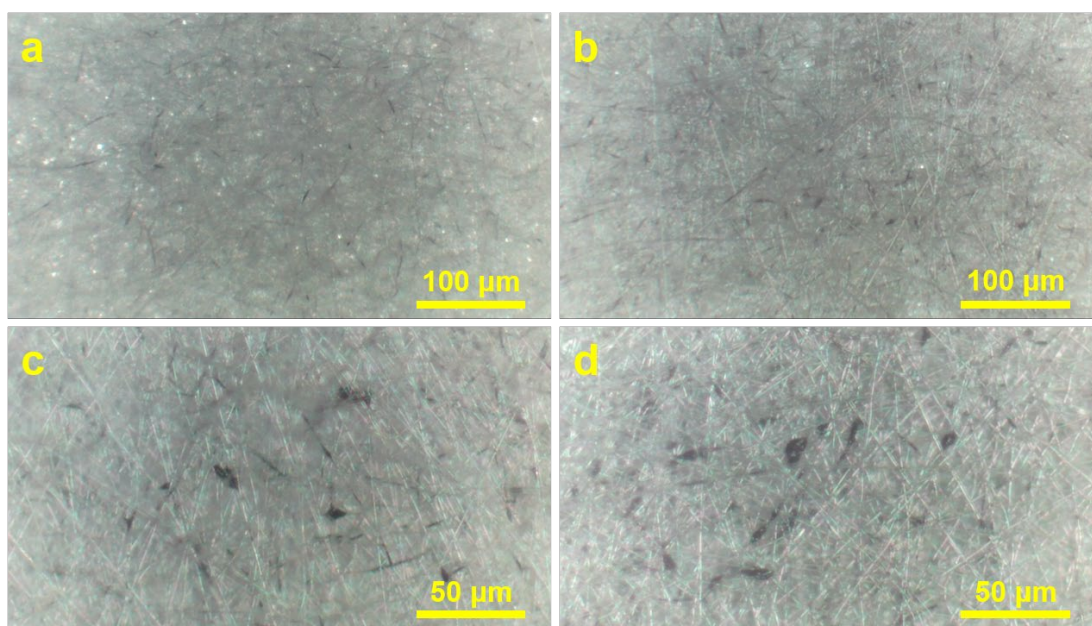

**Fig. S1** Optical microscope images of the electrospun PVDF membranes with (a) 0.1 wt%, (b) 0.3 wt%, (c) 0.5 wt% and (d) 1.0 wt% MWCNTs.

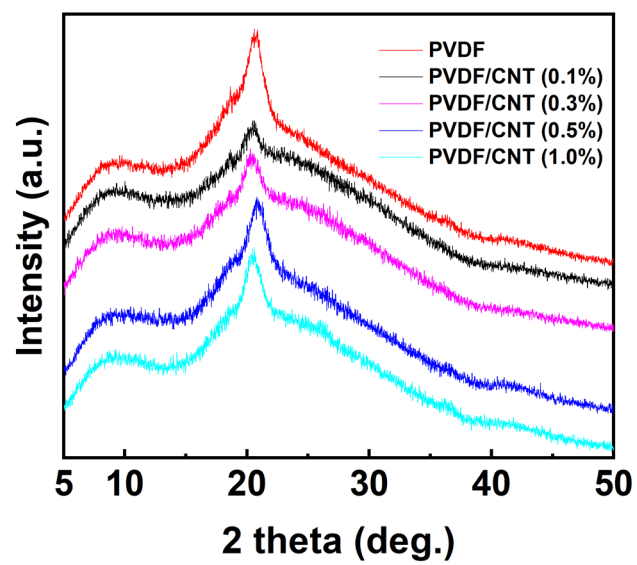

**Fig. S2** XRD patterns for electrospun pure PVDF and PVDF/MWCNTs membrane with different MWCNTs loads.

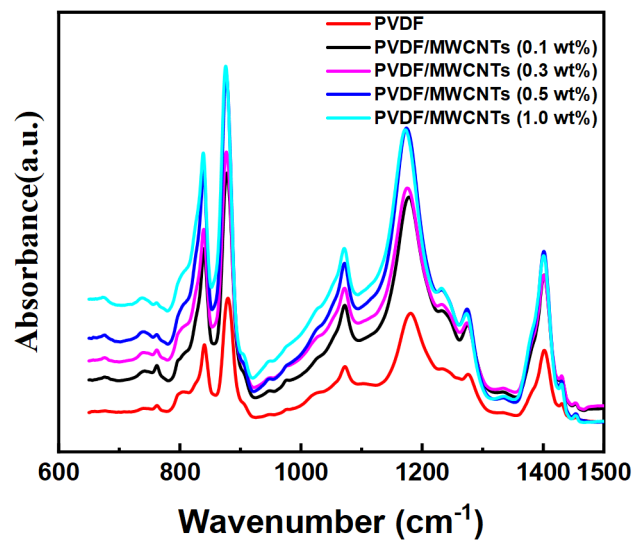

**Fig. S3** Complete FTIR spectra of electrospun PVDF and PVDF/MWCNTs membranes.

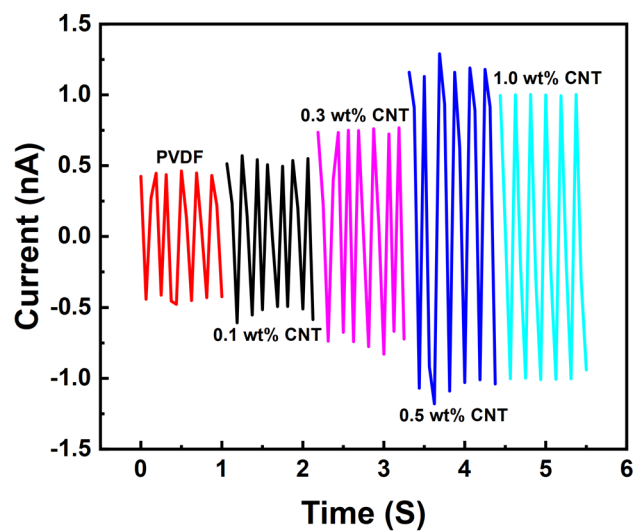

**Fig. S4** The output current for the electrospun PVDF/MWCNTs membranes.

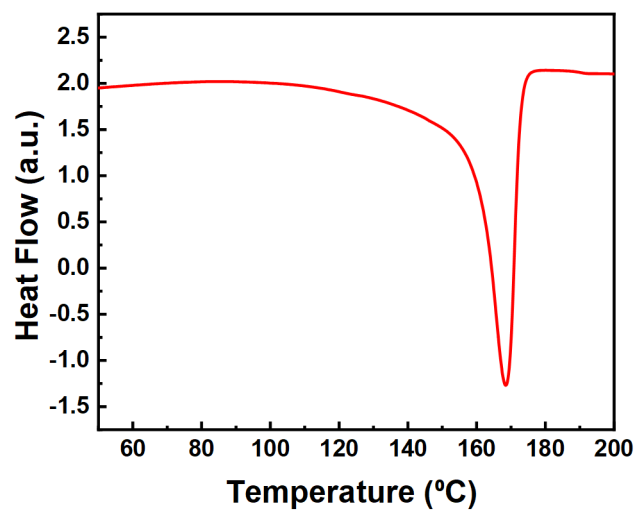

**Fig. S5** DSC thermogram of electrospun PVDF nanofiber membrane.

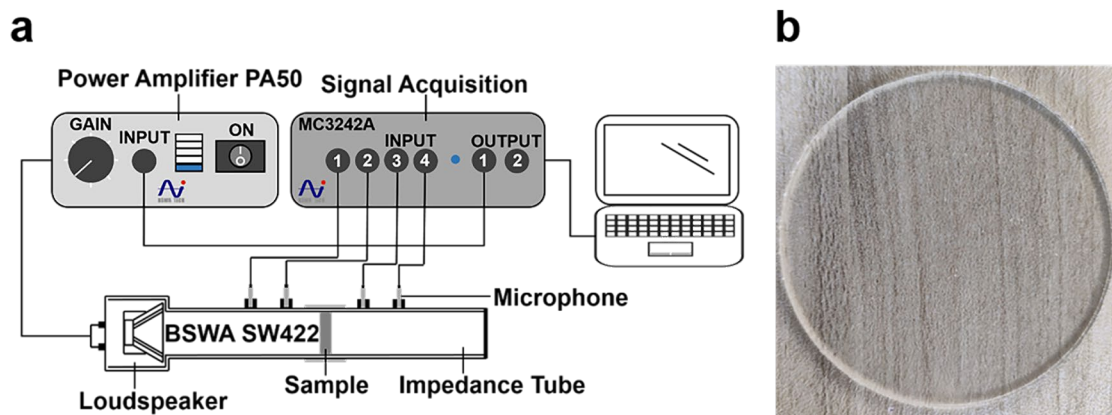

**Fig. S6** (a) Acoustical measurement system and (b) The image of the composite film for impedance detection.

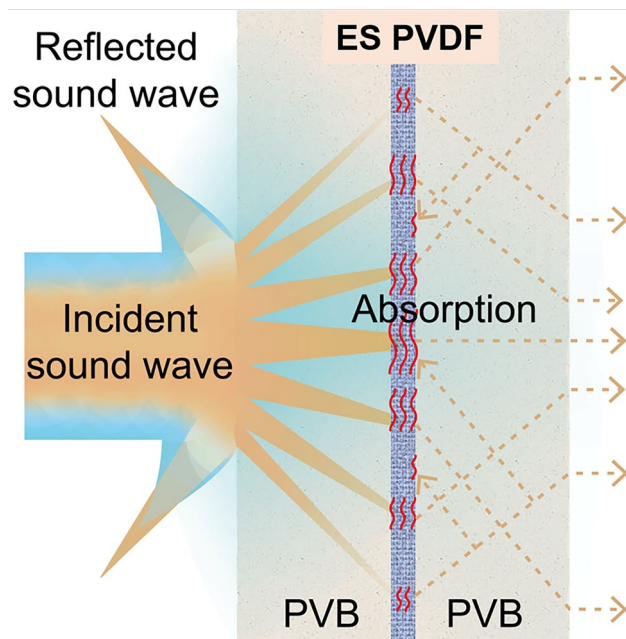

**Fig. S7** Sound insulation mechanism of PVB in composite film.



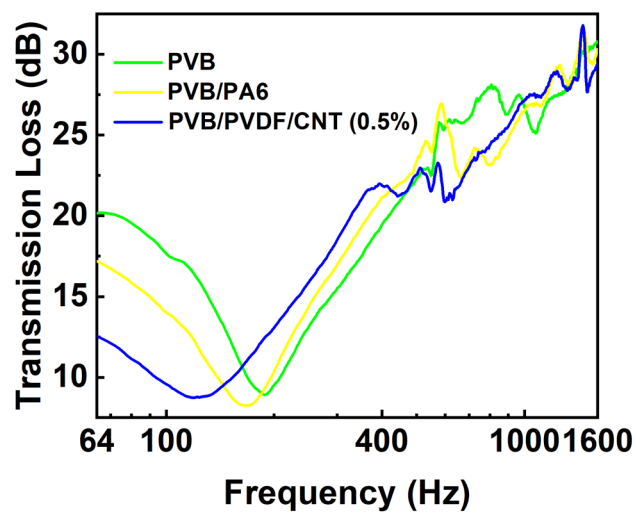

**Fig. S8** Comparison of transmission loss of pure PVB film, PVB/PVDF composite film and PVB/PA6 composite film.

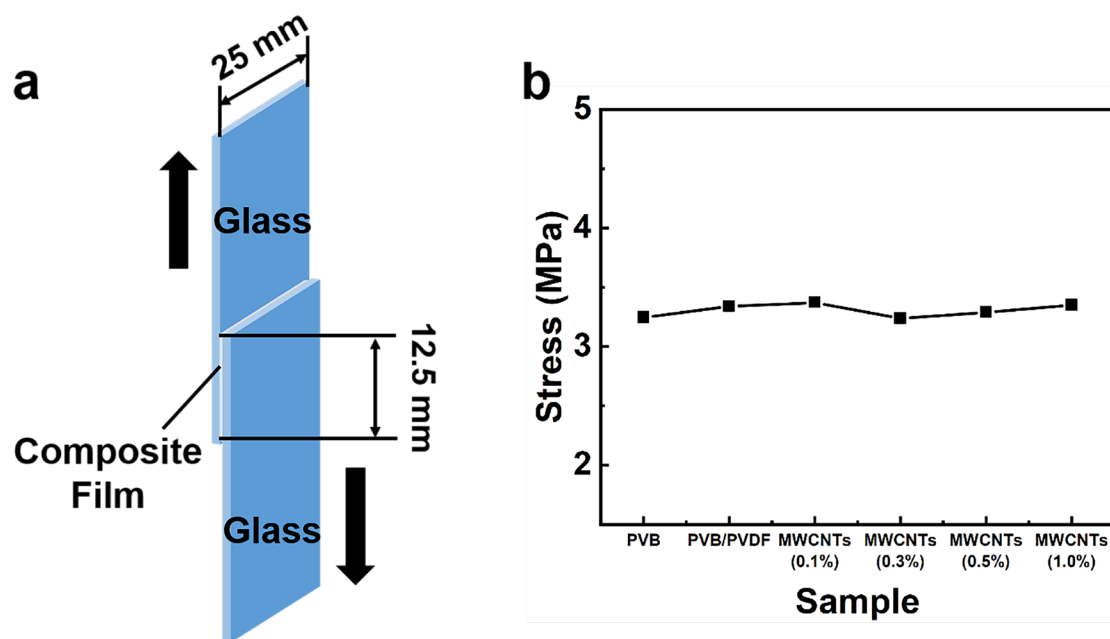

**Fig. S9** (a) Shear test diagram and (b) Comparison of shear strength of PVB/PVDF composites with different MWCNTs loads and PVB laminated glass.

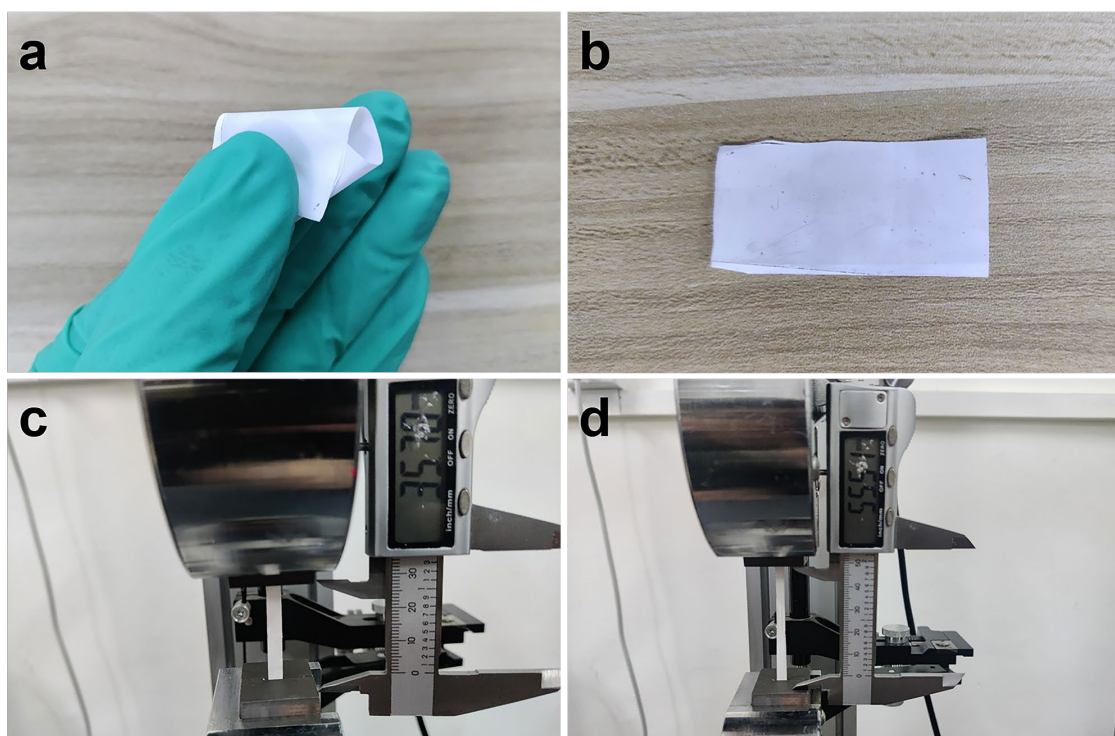

**Fig. S10** The images of PVDF fiber membrane after hot pressing (a) during bending, (b) after bending, (c) before stretching and (d) after stretching.

**Table S1** Measurement of specific surface area and porosity of electrospun PVDF and PVDF/MWCNTs membranes.

|                    | BET Surface Area (m <sup>2</sup> /g) | Pore Volume (cm <sup>3</sup> /g) | Pore Size (Å) |
|--------------------|--------------------------------------|----------------------------------|---------------|
| PVDF               | 4.3447                               | 4.73×10 <sup>-4</sup>            | 4.3528        |
| PVDF/MWCNTs (0.1%) | 3.7870                               | 2.82×10 <sup>-4</sup>            | 2.9835        |
| PVDF/MWCNTs (0.3%) | 0.0644                               | 2.2×10 <sup>-5</sup>             | 13.4629       |
| PVDF/MWCNTs (0.5%) | 0.0201                               | 1.1×10 <sup>-5</sup>             | 21.7710       |
| PVDF/MWCNTs (1.0%) | 0.0110                               | 3.3×10 <sup>-5</sup>             | 119.6159      |

**Table S2** Transmission loss of PVB/PVDF composite films with different loadings of MWCNTs at different frequencies.

| Sample                    | 200 Hz (dB) | 300 Hz (dB) | 400 Hz (dB) | 500 Hz (dB) |
|---------------------------|-------------|-------------|-------------|-------------|
| PVB                       | 9.5         | 15.5        | 19.4        | 22.3        |
| PVB/PVDF                  | 11.8        | 17.8        | 21.4        | 22.7        |
| PVB/PVDF/MWCNTs (0.1 wt%) | 12.7        | 18.0        | 22.1        | 23.8        |
| PVB/PVDF/MWCNTs (0.3 wt%) | 13.0        | 18.2        | 21.6        | 22.0        |
| PVB/PVDF/MWCNTs (0.5 wt%) | 13.1        | 18.5        | 21.9        | 22.5        |
| PVB/PVDF/MWCNTs (1.0 wt%) | 12.2        | 17.9        | 21.8        | 23.5        |

**Table S3** The breakage rate of all laminated glass with different interlayers.

| Sample               | PVB | PVB/PVDF | PVB/PVDF<br>(0.1 wt%) | PVB/PVDF<br>(0.3 wt%) | PVB/PVDF<br>(0.5 wt%) | PVB/PVDF<br>(1.0 wt%) |
|----------------------|-----|----------|-----------------------|-----------------------|-----------------------|-----------------------|
| Breakage<br>Rate (%) | 2.8 | 2.6      | 2.7                   | 2.6                   | 2.7                   | 2.5                   |
